# Supplementary material
Source: PubMed Central journal article supplement (PMC3038713)
Supplement: 1011361108_pnas.201011361SI.pdf [file 1011361108_pnas.201011361SI.pdf]

# Supporting Information

Preston et al. 10.1073/pnas.1011361108

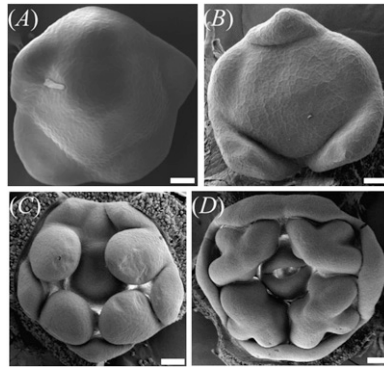

**Fig. S1.** Scanning electron micrographs showing flower development in insect-pollinated *Digitalis purpurea*. Floral organ differentiation proceeds from the ventral to dorsal domain (bottom to top in all images), starting with initiation of the ventral, followed by lateral, sepals (A and B). Although the dorsal sepal emerges last, it appears larger than the lateral sepals early in development due to repression of the latter by the lateral prophylls (B; prophylls removed). Stamens and petals develop around the same time in a ventral-to-dorsal sequence; the dorsal stamen fails to initiate, resulting in four stamens (C). During stamen differentiation, the gynoecium is initiated in the center of the flower and the two dorsal petals become almost completely fused (D). (Scale bars: 20  $\mu\text{m}$ .)

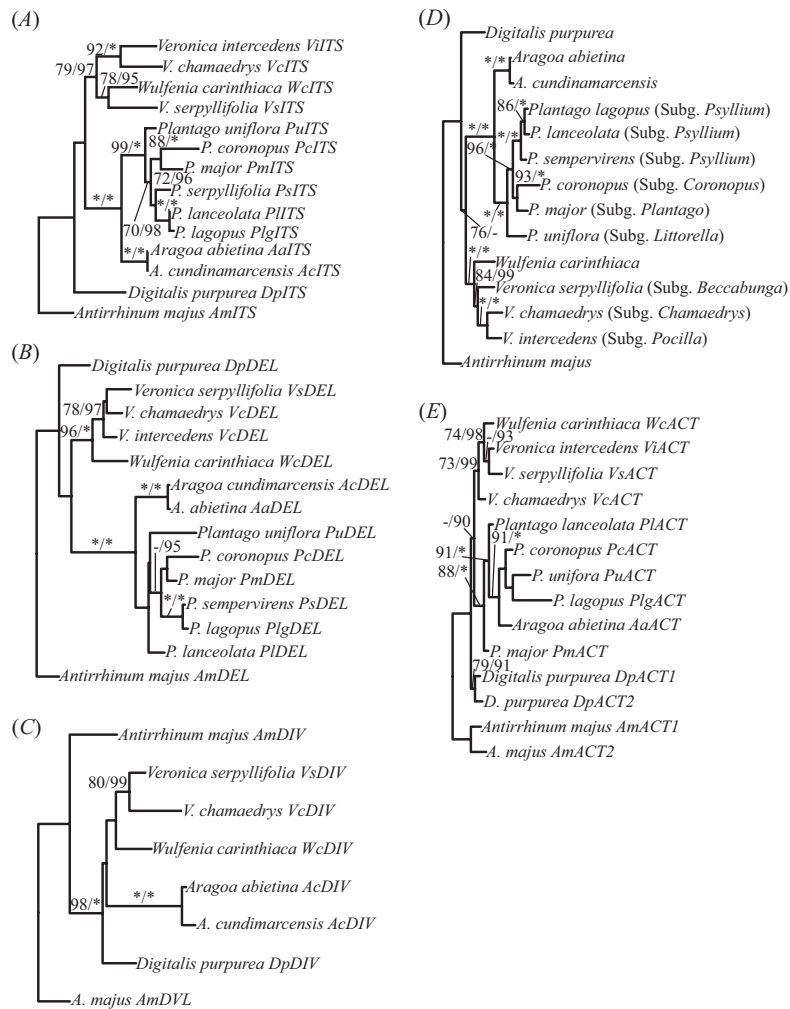

**Fig. S2.** Maximum-likelihood phylogenetic trees showing generic relationships between *Digitalis*, *Wulfenia*, *Veronica*, *Aragoa*, and *Plantago* inferred from the nuclear genes internal transcribed spacer (ITS) (A), *DELILA* (DEL) (B), the *DIVARICATA* (DIV) intron (C), *DEL*, ITS, and the *DIV* intron combined (D), and *ACTIN* (ACT) (E). The ITS dataset was assembled from GenBank-deposited sequences generated in previous studies (1–4). For all datasets, the closest homolog from *Antirrhinum majus* was selected as an outgroup to root the tree. Maximum-likelihood bootstrap values >70% (Left) and Bayesian posterior probabilities >90% (Right) are indicated. Asterisks represent support values of 100%. The subgenus (Subg.) is shown where applicable (D).

- Bello MA, Chase MW, Olmstead RG, Ronsted N, Albach D (2002) The páramo endemic *Aragoa* is the sister genus of *Plantago* (Plantaginaceae; Lamiales): Evidence from plastid *rbcl* and nuclear ribosomal ITS sequence data. *Kew Bull* 57:585–597.
- Ronsted N, Chase MW, Albach DC, Bello MA (2002) Phylogenetic relationships within *Plantago* (Plantaginaceae): Evidence from nuclear ribosomal ITS and plastid *trnL-F* sequence data. *Bot J Linn Soc* 139:323–338.
- Albach DC, Meudt HM, Oxelman B (2005) Piecing together the “new” Plantaginaceae. *Am J Bot* 92:297–315.
- Reeves PA, Olmstead RG (2003) Evolution of the TCP gene family in Asteridae: Cladistic and network approaches to understanding regulatory gene family diversification and its impact on morphological evolution. *Mol Biol Evol* 20:1997–2009.

Table S1. Codon model parameter estimates for symmetry genes

| Model*                               | Parameter estimates                                                                                                                                                                                            | lnL      | 2ΔlnL <sup>†</sup>                                                    |
|--------------------------------------|----------------------------------------------------------------------------------------------------------------------------------------------------------------------------------------------------------------|----------|-----------------------------------------------------------------------|
| <b>CYCLOIDEA</b>                     |                                                                                                                                                                                                                |          |                                                                       |
| One-ratio                            | $\omega = 0.0868$                                                                                                                                                                                              | -1677.96 |                                                                       |
| Two-ratio: <i>CYC1</i>               | $\omega_0 = 0.0834, \omega_1 = 0.4000$                                                                                                                                                                         | -1677.00 | (One- vs. two-ratio) $P < 1$                                          |
| Two-ratio: <i>CYC2a</i> <sup>‡</sup> | $\omega_0 = 0.0866, \omega_1 = 0.0900$                                                                                                                                                                         | -1677.96 | (One- vs. two-ratio) $P < 1$                                          |
| Two-ratio: <i>CYC2b</i> <sup>§</sup> | $\omega_0 = 0.0906, \omega_1 = 0.0001$                                                                                                                                                                         | -1675.91 | <b>(One- vs. two-ratio) <math>P &lt; 0.05</math></b>                  |
| Model 1a                             | $p_0 = 0.8632, p_1 = 0.1368 (p_{2a} + p_{2b} = 0.00),$<br>$\omega_0 = 0.0393, \omega_{2a} = 1.00000$                                                                                                           | -1630.11 |                                                                       |
| Null model A: <i>CYC1</i>            | $p_0 = 0.00, p_1 = 0.00, p_{2a} = 0.8583, p_{2b} = 0.1417,$<br>$\omega_0 = 0.0334, \omega_1 = 1.00, \omega_{2aback} = 0.0334,$<br>$\omega_{2afore} = 1.00, \omega_{2bback} = 1.00, \omega_{2bfore} = 1.00$     | -1625.19 |                                                                       |
| Model A: <i>CYC1</i>                 | $p_0 = 0.00, p_1 = 0.00, p_{2a} = 0.8583, p_{2b} = 0.1417, \omega_0 = 0.0334,$<br>$\omega_1 = 1.00, \omega_{2aback} = 0.0334, \omega_{2afore} = 1.00,$<br>$\omega_{2bback} = 1.00, \omega_{2bfore} = 1.00$     | -1625.19 | <b>(M1a vs. MA) <math>P &lt; 0.01</math></b><br>(null vs. MA) $P < 1$ |
| Model A: <i>CYC2a</i> <sup>‡</sup>   | $p_0 = 0.8166, p_1 = 0.1320, p_{2a} = 0.0443, p_{2b} = 0.0072,$<br>$\omega_0 = 0.0369, \omega_1 = 1.00, \omega_{2aback} = 0.0369, \omega_{2afore} = 1.00,$<br>$\omega_{2bback} = 1.00, \omega_{2bfore} = 1.00$ | -1629.87 | (M1a vs. MA) $P < 0.8$                                                |
| Model A: <i>CYC2b</i> <sup>§</sup>   | $p_0 = 0.8632, p_1 = 0.1368, p_{2a} = 0.0000, p_{2b} = 0.0000,$<br>$\omega_0 = 0.0393, \omega_1 = 1.00, \omega_{2aback} = 0.0393,$<br>$\omega_{2afore} = 1.00, \omega_{2bback} = 1.00, \omega_{2bfore} = 1.00$ | -1630.11 | (M1a vs. MA) $P < 1$                                                  |
| <b>RADIALIS</b>                      |                                                                                                                                                                                                                |          |                                                                       |
| One-ratio                            | $\omega = 0.0663$                                                                                                                                                                                              | -322.64  |                                                                       |
| Two-ratio                            | $\omega_0 = 0.0564, \omega_1 = 0.1024$                                                                                                                                                                         | -322.54  | (One- vs. two-ratio) $P < 0.75$                                       |
| Model 1a                             | $p_0 = 0.9616, p_1 = 0.0384 (p_{2a} + p_{2b} = 0.00),$<br>$\omega_0 = 0.0468, \omega_{2a} = 1.00000$                                                                                                           | -319.10  |                                                                       |
| Model A                              | $p_0 = 0.00, p_1 = 0.00, p_{2a} = 0.9548, p_{2b} = 0.0452,$<br>$\omega_0 = 0.0233, \omega_1 = 1.00, \omega_{2aback} = 0.0233,$<br>$\omega_{2afore} = 1.00, \omega_{2bback} = 1.00, \omega_{2bfore} = 1.00$     | -318.50  | (M1a vs. MA) $P < 0.50$                                               |
| <b>DIVARICATA</b>                    |                                                                                                                                                                                                                |          |                                                                       |
| One-ratio                            | $\omega = 0.0585$                                                                                                                                                                                              | -2151.50 | (One- vs. two-ratio) $P < 1$                                          |
| Two-ratio                            | $\omega_0 = 0.0576, \omega_1 = 0.0649$                                                                                                                                                                         | -2151.50 |                                                                       |
| Model 1a                             | $p_0 = 0.9391, p_1 = 0.0609 (p_{2a} + p_{2b} = 0.00),$<br>$\omega_0 = 0.0425, \omega_{2a} = 1.00000$                                                                                                           | -2118.37 |                                                                       |
| Model A                              | $p_0 = 0.9391, p_1 = 0.0609, p_{2a} = 0.0000, p_{2b} = 0.0000,$<br>$\omega_0 = 0.0423, \omega_1 = 1.00, \omega_{2aback} = 0.0425,$<br>$\omega_{2afore} = 1.00, \omega_{2bback} = 1.00, \omega_{2bfore} = 1.00$ | -2118.37 | (M1a vs. MA) $P < 1$                                                  |

\*Null model A was run only when the likelihood ratio test comparing model 1a (M1a) and model A (MA) was significant at the 0.05 level (bold).

<sup>†</sup>The likelihood ratio test was conducted using one (one-ratio vs. two-ratio; null vs. MA) and two (M1a vs. MA) degrees of freedom.

<sup>‡</sup>*Plantago TCP1* as the foreground branch.

<sup>§</sup>*Plantago + Aragoa TCP1* as the foreground branch.
